# Supplementary material for: 231 Pa and 230 Th in the ocean model of the Community Earth System Model (CESM1.3)
Source: Copernicus journal article supplement (doi:10.5194/gmd-10-4723-2017), 2017-12-22
Supplement: Supplementary file 1 [file gmd-10-4723-2017-supplement.zip]

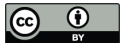

## *Supplement of*

# <sup>231</sup>Pa and <sup>230</sup>Th in the ocean model of the Community Earth System Model (CESM1.3)

Sifan Gu and Zhengyu Liu

*Correspondence to:* Sifan Gu (sgu28@wisc.edu)

- gmd-10-4723-2017-supplement-title-page.pdf
- Pa\_Th\_SI\_171115\_SG.pdf
- code
  - build-namelist
  - ecosys\_driver.F90
  - ecosys\_mod.F90
  - ecosys\_path\_mod.F90
  - ecosys\_share.F90
  - namelist\_defaults\_pop2.xml
  - namelist\_definition\_pop2.xml
  - ocn.eco\_path.tavg.csh
  - ocn.path.tavg.csh
  - passive\_tracer\_tools.F90
  - passive\_tracers.F90
  - path\_mod.F90
  - pop2.buildexe.csh

The copyright of individual parts of the supplement might differ from the CC BY 3.0 License.
